# Supplementary material for: Technological innovation vs. tightening raw material markets: falling battery costs put at risk
Source: Royal Society of Chemistry journal article supplement (doi:10.1039/d1ya00052g), 2022-01-01
Supplement: d1ya00052g1.xlsx [file d1ya00052g1.xlsx]

## Sheet: Sheet1
				Time period
Element	Product	Source	Link	Start	End	Unit	Initial value	Forecasted value	CAGR (compound annual growth rate)
Lithium	LCE	S&P Global	https://www.spglobal.com/platts/en/market-insights/latest-news/metals/042821-cobalt-lithium-to-move-into-deficit-by-2024-2025-mi	2021	2025	$ per t	9345	10500	0.029562
Lithium	Li hydroxide	Benchmark Minerals	https://piedmontlithium.com/wp-content/uploads/2192948-1.pdf	2020	2030	$ per t	12180	12900	0.00575973
Lithium	Li hydroxide	Benchmark Minerals	https://piedmontlithium.com/wp-content/uploads/2192948-1.pdf	2020	2025	$ per t	12180	14630	0.0373359
Lithium	Li hydroxide	S&P Global	https://piedmontlithium.com/wp-content/uploads/2185275.pdf	2020	2030	$ per t	8980	12360	0.0324623
Lithium	Battery-grade Li carbonate	Macquairie	https://content.macquarie.com/macquarie-capital/asia/2021/events/indo-mining-mar/Global%20auto%20and%20battery%20demand_Quantifying%20metal%20demand.pdf	2020	2025	$ per t	8245	9665	0.0322912
Lithium	Li hydroxide	Roskill	https://www.ioneer.com/files/presentation/files/200623_ioneer_investor_deck_july_v.f.pdf	2020	2028	$ per t	11550	15840	0.0402714
Lithium	Li hydroxide	Roskill	https://www.ioneer.com/files/presentation/files/200623_ioneer_investor_deck_july_v.f.pdf	2020	2025	$ per t	11550	15140	0.0556228
Nickel	Metal	Fitch	https://www.fitchsolutions.com/sites/default/files/white-papers/Global%20Summary%20Mining%2015th%20March%202021.pdf?mkt_tok=NzMyLUNLSC03NjcAAAF8EQtce3dPyH2AnT74Zki5XXy6ExZ55edDStTqX6IlR8qvHX82WiJbrI_KcRnN4Q1XlfO7n-4i3CnSSDbop3FoasKriJVWuYjJhq0BDh4Ax0Nd8A	2020	2025	$ per t	13175	18260	0.0674561
Nickel	Metal	S&P Global	https://www.terrastudio.biz/site_files/4683/upload_files/blog/NIckelMarketUpdateNov20.pdf?dl=1	2020	2028	$ per t	14870	19400	0.0337996
Nickel	Metal	Bloomberg/Australia Department of Industry, Science, Energy and Resources	https://publications.industry.gov.au/publications/resourcesandenergyquarterlymarch2021/documents/Resources-and-Energy-Quarterly-March-2021-Nickel.pdf	2020	2026	$ per t	13780	22935	0.0886165
Nickel	Metal	Wood Mackenzie	https://dumontnickel.com/wp-content/uploads/2020/08/Dumont-Nickel-Presentation-August-2020.pdf	2020	2025	$ per lb	6.8	10.4	0.0886916
Nickel	Metal	Wood Mackenzie	https://dumontnickel.com/wp-content/uploads/2020/08/Dumont-Nickel-Presentation-August-2020.pdf	2020	2030	$ per lb	6.8	9.5	0.0340022
Nickel	Refined	Scotiabank	https://fpxnickel.com/wp-content/uploads/2017/08/FPX-Nickel-Corporate-Presentation.pdf	2020	2025	$ per lb	6.3	8	0.0489382
Nickel	unspecified	Macquairie	https://content.macquarie.com/macquarie-capital/asia/2021/events/indo-mining-mar/Global%20auto%20and%20battery%20demand_Quantifying%20metal%20demand.pdf	2020	2025	$ per t	14165	16085	0.0257485
Manganese	China CIF, Mn ore	Roskill 2019	https://www.element25.com.au/site/PDF/97fd9ce5-74d2-4a11-ba67-53ba9cc72f3f/UpdatedPreFeasibilityandExpansionStudies	2020	2030	$ per dmtu	6.11	6.3	0.00306698
Manganese	China CIF, Mn ore	Roskill 2019	https://www.element25.com.au/site/PDF/97fd9ce5-74d2-4a11-ba67-53ba9cc72f3f/UpdatedPreFeasibilityandExpansionStudies	2020	2025	$ per dmtu	6.11	6.3	0.00614337
Manganese	Mn ore	TripleC Consulting	https://www.gulfmanganese.com/wp-content/uploads/2019/08/GMC-Research-Aug-2019.pdf	2020	2023	$ per t	288	320	0.0357442
Cobalt	battery-grade metal	Benchmark Minerals	https://miningfeeds.com/2020/11/12/first-cobalt-corp-substantial-cash-flow-from-cobalt-refinery-by-late-2022/	2020	2030	$ per t	38540	61815	0.0483788
Cobalt	battery-grade metal	Benchmark Minerals	https://miningfeeds.com/2020/11/12/first-cobalt-corp-substantial-cash-flow-from-cobalt-refinery-by-late-2022/	2020	2025	$ per t	38540	69010	0.12357
Cobalt	unspecified	Macquairie	https://content.macquarie.com/macquarie-capital/asia/2021/events/indo-mining-mar/Global%20auto%20and%20battery%20demand_Quantifying%20metal%20demand.pdf	2020	2025	$ per t	37910	63925	0.110154
Cobalt	Co metal	S&P Global	https://www.spglobal.com/platts/en/market-insights/latest-news/metals/042821-cobalt-lithium-to-move-into-deficit-by-2024-2025-mi	2021	2025	$ per lb	21	29.91	0.0924442
Graphite	China FOB, 96-97% C, +80 mesh	Benchmark Minerals	https://www.batteryminerals.com/wp-content/uploads/2019/02/2019-02-05-BAT-Company-Presentation_201812_121_final.pdf	2020	2030	$ per t	1640	2310	0.0348486
Graphite	China FOB, 96-97% C, +80 mesh	Benchmark Minerals	https://www.batteryminerals.com/wp-content/uploads/2019/02/2019-02-05-BAT-Company-Presentation_201812_121_final.pdf	2020	2025	$ per t	1640	1830	0.022166
Graphite	Europe CIF, 97% C, +80 mesh	Fastmarkets	https://tirupatigraphite.co.uk/pdf/TirupatiProspectus.pdf	2020	2025	$ per t	1485	2285	0.0900137
Graphite	China FOB, 94-95% C, +80 mesh	UBS	https://hotcopper.com.au/data/announcements/ASX/6A1027587_BEM.pdf	2021	2025	$ per t	590	824	0.0870983
			Date accessed: 25.06.2021
